# Supplementary material for: Innovative Approach of Non-Thermal Plasma Application for Improving the Growth Rate in Chickens
Source: PubMed Central journal article supplement (PMC6121326; doi:10.3390/ijms19082301), 2018-08-06
Supplement: ijms-19-02301-s001.pdf [file ijms-19-02301-s001.pdf]

# Supplementary Materials

## Supplementary Figures

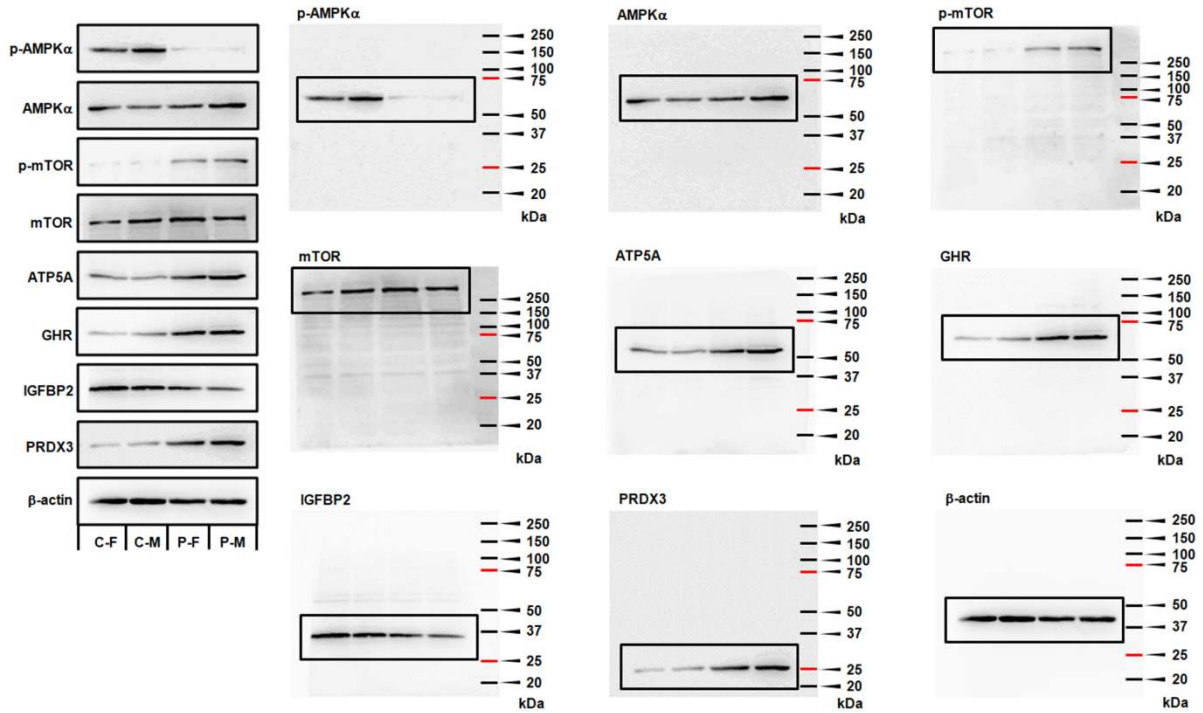

**Figure S1.** Scans of all immunoblots for Figure 7a. The grouping of gels/blots cropped from different gels. All blots are visualized with 5 min exposure time.
